# Supplementary material
Source: PubMed Central journal article supplement (PMC11027708)
Supplement: 262_2020_2550_MOESM1_ESM.pdf [file 262_2020_2550_MOESM1_ESM.pdf]

Table S1. Clinicopathological characteristics in each cohort.

Table S2. Immunohistochemistry (IHC) procedure and antibodies.

Table S3. Flow cytometry procedure and antibodies.

Table S4. Full multivariate Cox regression analysis for overall of patients with gastric cancer according to Lauren classification in Zhongshan TMA and TCGA cohort.

Figure S1. Differential expression of CD8<sup>+</sup> T cell signature genes between intestinal and diffuse type gastric cancer patients in TCGA cohort.

Figure S2. Numbers and functional status of CD8<sup>+</sup> T cells in peritumor gastric mucosa tissues.

Figure S3. Representative immunohistochemistry images of interleukin-10, transforming growth factor- $\beta$ 1 and Indoleamine 2,3-Dioxygenase 1 in intestinal type and diffuse type gastric cancer.

**Table S1. Clinicopathological characteristics in each cohort.**

| Group                 | Zhongshan TMA cohort | TCGA cohort | Zhongshan FCM cohort |
|-----------------------|----------------------|-------------|----------------------|
| Number of patients    | 456                  | 235         | 63                   |
| Gender                |                      |             |                      |
| Male                  | 320                  | 153         | 50                   |
| Female                | 136                  | 82          | 13                   |
| Age (years)           | 60.0±11.7            | 64.3±10.6   | 66.5±8.4             |
| Tumor size            | 3.8±2.2              | -           | 4.4±2.4              |
| Lauren classification |                      |             |                      |
| Intestinal            | 281                  | 159         | 36                   |
| Diffuse               | 169                  | 76          | 27                   |
| pTNM stage            |                      |             |                      |
| Stage I               | 107                  | 28          | 11                   |
| Stage II              | 107                  | 60          | 18                   |
| Stage III             | 236                  | 121         | 34                   |
| Stage IV              | 6                    | 26          | -                    |
| Tumor grade           |                      |             |                      |
| Grade 1               | 14                   | 8           | 1                    |
| Grade 2               | 94                   | 85          | 13                   |
| Grade 3               | 348                  | 134         | 48                   |
| Grade X               | -                    | 8           | 1                    |

Abbreviations: TNM = tumor node metastasis.

**Table S2. Immunohistochemistry (IHC) procedure and antibodies.**

| No. | Antibody name                               | Description          | Company | Catalog No. | Diluted |
|-----|---------------------------------------------|----------------------|---------|-------------|---------|
| 1   | Anti-CD8 alpha antibody                     | Mouse<br>monoclonal  | Abcam   | Ab17147     | 1:100   |
| 2   | Anti-Granzyme B                             | Rabbit<br>polyclonal | Abcam   | Ab4059      | 1:100   |
| 2   | Anti-IL-10 antibody                         | Mouse<br>monoclonal  | Abcam   | Ab134742    | 1:400   |
| 3   | Anti- Indoleamine 2, 3-dioxygenase antibody | Mouse<br>monoclonal  | Abcam   | Ab55305     | 1:500   |
| 4   | Anti-TGF- $\beta$ 1 antibody                | Goat monoclonal      | R&D     | Ab-246-NA   | 1:400   |

**IHC procedures.** Formalin-fixed paraffin-embedded surgical specimens were collected and used for tissue microarray construction and subsequent immunohistochemistry studies. Tissue blocks were sectioned at 4 mm diameter and mounted on glass slides. The slides were dewaxed in dry-heat oven, xylene and graded alcohols, and then washed with phosphate-buffered saline for 3 times. After treated with 3% H<sub>2</sub>O<sub>2</sub> for 30 minutes at 37°C, the slides were boiled in sodium citrate buffer with a microwave oven for 14 minutes and then treated with 10% normal goat serum blocking solution for 120 minutes at 37°C. Primary antibodies (anti-CD8 alpha, Anti-Granzyme B, anti-IL-10, Anti-Indoleamine 2, 3-dioxygenase and anti-TGF- $\beta$ 1; diluted as preceding described), were applied in a moist chamber at 4°C overnight. After washed off the primary antibody, the slides stained with secondary HRP-labeled antibody in blocking buffer for 1 hour at room temperature, then developed with DAB reagent for 2 minutes, and counterstained with hematoxylin for 3 minutes.

**Table S3. Flow cytometry procedure and antibodies.**

| No. | Antibody name   | Description      | Company     | Catalog No. | Fluorochrome |
|-----|-----------------|------------------|-------------|-------------|--------------|
| 1   | Anti-CD45       | Mouse monoclonal | Biolegend   | 368532      | PE/Cy7       |
| 2   | Anti-CD3        | Mouse monoclonal | Biolegend   | 300328      | PerCP/Cy5.5  |
| 3   | Anti-CD8        | Mouse monoclonal | BD          | 555366      | FITC         |
| 4   | Anti-Granzyme B | Mouse monoclonal | eBioscience | MA5-23688   | PE           |
| 5   | Anti-CD107a     | Mouse monoclonal | BD          | 560664      | APC          |
| 6   | Anti-perforin   | Mouse monoclonal | BD          | 563576      | AF647        |
| 7   | Anti-IFN gamma  | Mouse monoclonal | eBioscience | 56-7319-42  | AF700        |
| 8   | Anti-PD-1       | Mouse monoclonal | BD          | 558694      | APC          |
| 9   | Anti-TIM-3      | Mouse monoclonal | BD          | 563422      | PE           |
| 10  | Anti-CTLA-4     | Mouse monoclonal | Biolegend   | 369610      | BV605        |
| 11  | Anti-LAG-3      | Mouse monoclonal | Biolegend   | 369322      | BV785        |

Flow cytometry protocol: For fresh tumor tissues, single cells were isolated by using collagenase IV. Approximately  $1 \times 10^6$  cells were centrifuged and incubated in RBC lysis buffer on ice for 15 minutes, incubated with Human TruStain FcX (Biolegend) for Fc receptor blocking and stained for surface markers in cell staining buffer for 30 minutes at 4°C in the dark. After being washed with cell staining buffer, cells were fixed with fixation buffer (Biolegend) and permeabilized with intracellular staining permeabilization wash buffer (Biolegend). Intracellular cytokine staining was then performed in intracellular staining permeabilization wash buffer for 30 minutes at 4°C in the dark. The primary antibody used for flow cytometry were as listed above.

**Table S4. Full multivariate Cox regression analysis for overall survival of patients with gastric cancer according to Lauren classification in Zhongshan TMA and TCGA cohort.**

| Subgroup                            | Zhongshan TMA cohort |                      | TCGA cohort         |                      |
|-------------------------------------|----------------------|----------------------|---------------------|----------------------|
|                                     | HR (95%CI)           | P-value <sup>a</sup> | HR (95%CI)          | P-value <sup>a</sup> |
| <b>All patients</b>                 |                      |                      |                     |                      |
| TNM stage: Stage 3+4 vs Stage 1+2   | 4.168 (3.001-5.772)  | <b>&lt;0.001</b>     | 2.347 (1.409-3.907) | <b>0.001</b>         |
| Tumor grade: Grade 3+X vs Grade 1+2 | 0.881(0.689-1.375)   | 0.881                | 1.200(0.959-1.500)  | 0.112                |
| Age: ≥65 vs < 65                    | 1.093(0.831-1.437)   | 0.527                | 1.646 (1.058-2.562) | 0.028                |
| Sex: female vs male                 | 1.308(0.985-1.736)   | 0.065                | 0.873(0.549-1.388)  | 0.567                |
| CD8+ T cells: high vs low           | 0.788(0.604-1.028)   | 0.080                | 0.615(0.390-0.968)  | 0.037                |
| <b>Intestinal type</b>              |                      |                      |                     |                      |
| TNM stage: Stage 3+4 vs Stage 1+2   | 4.060 (2.670-6.175)  | <b>&lt;0.001</b>     | 2.436(1.282-4.629)  | <b>0.007</b>         |
| Tumor grade: Grade 3+X vs Grade 1+2 | 0.757 (0.509-1.127)  | 0.173                | 1.256(0.963-1.638)  | 0.095                |
| Age: ≥65 vs < 65                    | 1.227(0.860-1.750)   | 0.261                | 1.744(0.994-3.058)  | 0.054                |
| Sex: female vs male                 | 1.508(1.032-2.204)   | <b>0.035</b>         | 1.213(0.699-2.103)  | 0.495                |
| CD8+ T cells: high vs low           | 0.514(0.358-0.736)   | <b>&lt;0.001</b>     | 0.543(0.323-0.913)  | <b>0.022</b>         |
| <b>Diffuse type</b>                 |                      |                      |                     |                      |
| TNM stage: Stage 3+4 vs Stage 1+2   | 4.572 (2.694-7.759)  | <b>&lt;0.001</b>     | 2.591(1.076-6.237)  | <b>0.035</b>         |
| Tumor grade: Grade 3+X vs Grade 1+2 | 1.722 (0.544-5.455)  | 0.358                | 0.863(0.411-1.815)  | 0.699                |
| Age: ≥65 vs < 65                    | 1.018(0.657-1.578)   | 0.937                | 1.061(0.466-2.416)  | 0.888                |
| Sex: female vs male                 | 1.091(0.711-1.671)   | 0.692                | 0.387(0.149-1.004)  | 0.052                |
| CD8+ T cells: high vs low           | 1.306(0.834-2.046)   | 0.247                | 1.169(0.395-3.455)  | 0.779                |

Abbreviations: HR = Hazard Ratio; 95%CI= 95% confidence interval.

<sup>a</sup> P-value<0.05 marked in bold font shows statistically significant.

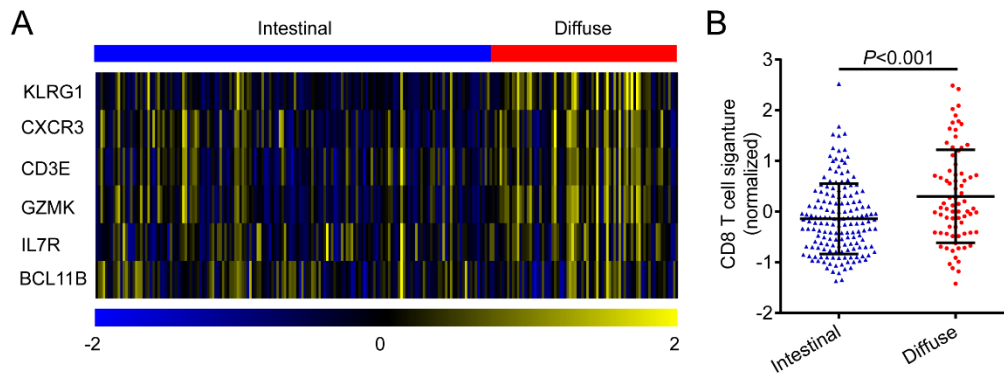

**Figure S1. Differential expression of CD8<sup>+</sup> T cell signature genes between intestinal and diffuse type gastric cancer patients in TCGA cohort.** (A). A 2D heatmap showing different expression of CD8<sup>+</sup>T cell signature genes between intestinal (n=169) and diffuse type (n=76) gastric cancer patients in TCGA cohort. (B). Average expression of CD8<sup>+</sup> T cell signature genes in intestinal type (n=169) and diffuse type (n=76) gastric cancer patients from the TCGA cohort.

TCGA = The Cancer Genome Atlas.

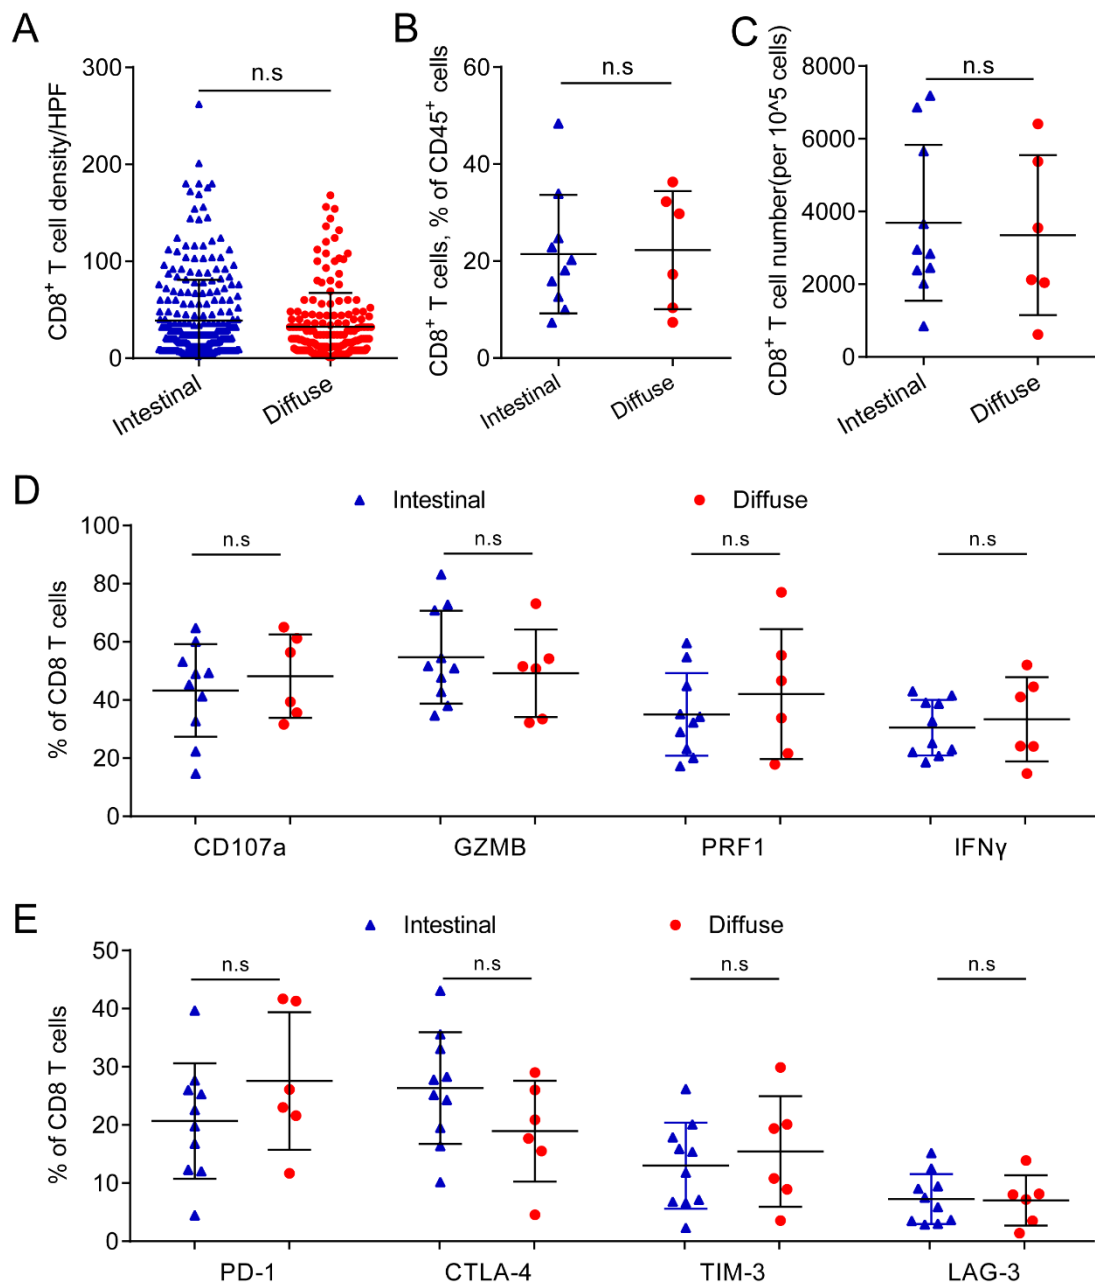

**Figure S2. Numbers and functional status of CD8<sup>+</sup> T cells in peritumor gastric mucosa**

**tissues.** (A). Peritumoral CD8<sup>+</sup> T cell infiltration density in intestinal type (n=286) and diffuse type (n=170) gastric cancer patients from Zhongshan TMA cohort. (B). Proportions among all CD45<sup>+</sup> leukocytes and absolute numbers of CD8<sup>+</sup> T cells in intestinal type (n=9) and diffuse type (n=7) gastric cancer patients detected by flow cytometry. (C). Flow cytometrical analysis of effector molecules CD107a, GZMB, PRF1 and IFN- $\gamma$  expression in CD8<sup>+</sup> T cells from

peritumor tissues with intestinal (n=9) and diffuse (n=7) type gastric cancer. (D). Flow cytometrical analysis of effector molecules PD-1, CTLA-4, TIM-3 and LAG-3 expression in CD8<sup>+</sup> T cells from peritumor tissues with intestinal (n=9) and diffuse (n=7) type gastric cancer. GZMB = granzyme B; IFN- $\gamma$  = interferon gamma; PRF1=perforin; PD-1 = programmed cell death 1; CTLA-4 = cytotoxic T lymphocyte associated protein-4; TIM-3= T cell immunoglobulin domain and mucin domain-3; LAG-3 = lymphocyte activation gene-3; n. s = no significance.



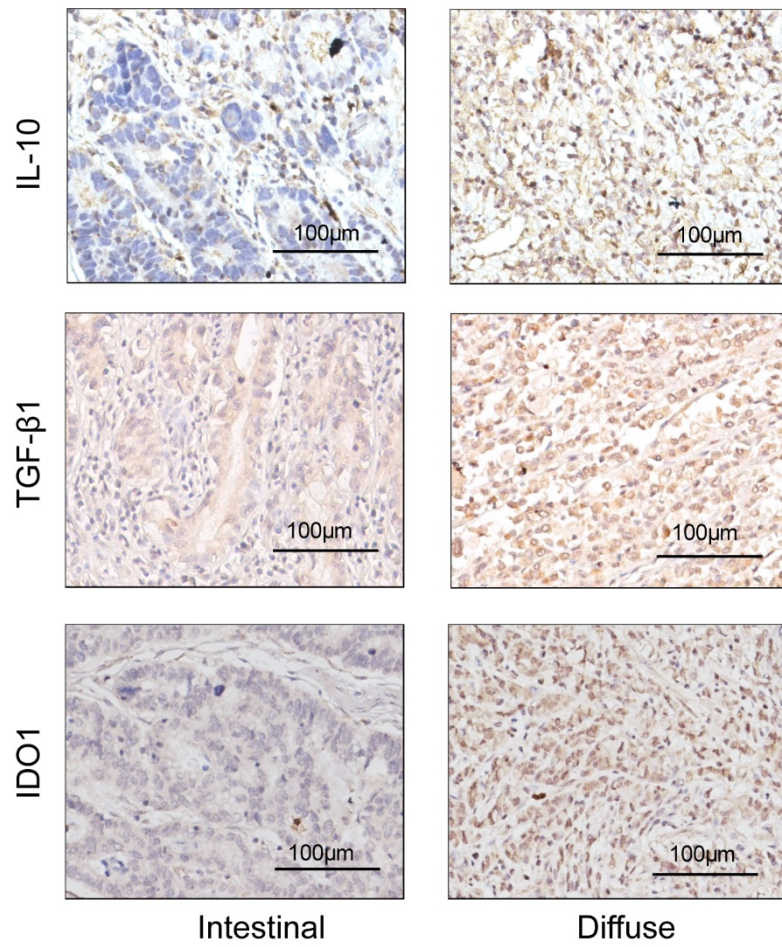

**Figure S3. Representative immunohistochemistry images of interleukin-10 transforming growth factor-β1 and Indoleamine 2,3-Dioxygenase 1 in intestinal type and diffuse type gastric cancer.**
